1 **Zika and dengue viruses infecting wild-caught mosquitoes in an environmental**  
2 **protection area in Brazil**

3

4 Karolina Morales Barrio-Nuevo<sup>1</sup>, Antônio Ralph Medeiros-Sousa<sup>1</sup>, Walter Ceretti-Junior<sup>1</sup>, Aristides  
5 Fernandes<sup>1</sup>, Iray Maria Rocco<sup>2</sup>, Mariana Sequetin Cunha<sup>2</sup>, Adriana Luchs<sup>3</sup>, Luis Filipe Mucci<sup>4</sup>,  
6 Renato Pereira de Souza<sup>2</sup>, Mauro Toledo Marrelli<sup>1,\*</sup>

7

8 <sup>1</sup>Epidemiology Department, School of Public Health, University of São Paulo, Brazil

9

10 <sup>2</sup>Vector-borne Disease Laboratory, Virology Center, Adolfo Lutz Institute, São Paulo, Brazil

11

12 <sup>3</sup>Enteric Disease Laboratory, Virology Center, Adolfo Lutz Institute, São Paulo, Brazil

13

14 <sup>4</sup>Superintendency for the Control of Endemic Diseases, State Health Secretariat, São Paulo, Brazil.

15

16 \*Corresponding author

17 E-mail: [mmarelli@usp.br](mailto:mmarelli@usp.br)

18

## 19 Abstract

20 Species of the genus *Flavivirus* are widespread in Brazil and are a major public health concern.  
21 The city of São Paulo is in a highly urbanized area with some green spaces which are used for  
22 recreation and where potential vertebrate hosts and mosquito vectors of these arboviruses can be  
23 found, a scenario that can contribute to the transmission of flaviviruses to humans. This study  
24 therefore sought to investigate natural flavivirus infection in mosquitoes collected in the Capivari-  
25 Monos Environmental Protection Area (EPA) in the south of the city. Monthly mosquito collections  
26 were carried out from March 2016 to April 2017 with CO<sub>2</sub>-baited CDC light traps. Specimens were  
27 identified morphologically and grouped in pools. A total of 260 pools of non-engorged females were  
28 inoculated into the C6/36 cell lineage after analysis by indirect immunofluorescence assay (IFA).  
29 IFA-positive specimens were tested by qRT-PCR with genus-specific primers targeting a region of  
30 ~260 nucleotides in the flavivirus NS5 gene, and the PCR products were sequenced to confirm and  
31 identify the flavivirus species. *Anopheles (Kerteszia) cruzii* and *Wyeomyia (Prosopolepis) confusa*  
32 were the most frequent species collected. Zika virus (ZIKV) nucleotide sequences were detected in  
33 three mosquito species, *An. cruzii*, *Limatus durhami* and *Wy. confusa*, and dengue virus 2 (DENV-2)  
34 sequences in *Culex* spp. and *Culex (Mel.) vaxus*. To our knowledge, this is the first report of natural  
35 isolation of DENV-2 and ZIKV in sylvatic species of mosquitoes in the Capivari-Monos EPA. Our  
36 findings suggest that DENV-2 is present in *Culex* mosquitoes, and ZIKV in *Anopheles*, *Wyeomyia*  
37 and *Limatus*. The flavivirus species identified here are of medical importance; surveillance is  
38 therefore recommended in this EPA, where vertebrates and mosquitoes can act as flavivirus hosts and  
39 vectors.

40 **Keywords:** Culicidae, *Flavivirus*, Dengue, Zika, Atlantic Forest, Surveillance

41

## 42 Introduction

43 Over 700,000 deaths worldwide every year are caused by infections transmitted by blood-  
44 feeding arthropods, accounting for 17% of all infectious diseases [1,2]. Mosquitoes have vector  
45 competence for viruses of great epidemiological importance, as seen in recent major outbreaks and  
46 epidemics of Chikungunya-virus (CHIKV), Dengue-virus (DENV), Zika-virus (ZIKV) and Yellow  
47 Fever-virus (YFV) infections in Brazil [3,4]. Arbovirus diseases occur worldwide, and their  
48 emergence and reemergence usually manifest as infections with mild to severe clinical symptoms in  
49 humans and domestic animals, occasionally progressing to death. These diseases therefore have a  
50 considerable impact on public health and the economy of the region affected [5-7].

51 Among the arthropod-borne viruses (arboviruses) circulating in Brazil, members of genus  
52 *Flavivirus* (family Flaviviridae) are noteworthy as they are the most common cause of viral infections  
53 and diseases in humans. In addition to DENV, ZIKV and YFV, several other flaviviruses of medical  
54 importance have been isolated in Brazil, including Bussuquara virus (BUSV), Cacicaporé virus  
55 (CPCV), Rocio virus (ROCV), Iguape virus (IGUV), Ilhéus virus (ILHV) and Saint Louis  
56 encephalitis virus (SLEV) [8-11]. Dengue is a reemerging disease in the country, with over 2 million  
57 confirmed cases and 702 recent deaths [12]. ZIKV has gained global attention as its geographic  
58 distribution has expanded dramatically from equatorial Africa and Asia to the Pacific Islands, South  
59 America and the Caribbean, causing many cases of neurological disorders and neonatal  
60 malformations [13-15].

61 Prevention and control of arboviruses require proper surveillance and vector control measures.  
62 Investment in appropriate integrated surveillance measures should therefore be a priority in Brazil,  
63 especially considering the size of the country's population. Integrated surveillance, which covers  
64 epidemiological, entomological, sanitary and laboratory surveillance, is essential for the early  
65 detection of epidemics and for rapid, effective control measures [16]. Donalísio et al. [16] stress that  
66 investment in epidemiological, virological, vector and epizootic surveillance measures should be  
67 priorities in Brazil. In addition, in the absence of specific treatment and an effective vaccine, ongoing  
68 entomological and epidemiological surveillance should be strengthened and integrated to control and  
69 prevent these arbovirus diseases in Brazil [3].

70 The Capivari-Monos Environmental Protection Area (EPA), in the south of the city of São  
71 Paulo, Brazil, is a forest remnant close to urban areas. Previous studies in the Atlantic Forest in Brazil  
72 have shown that forest fragments offer favorable conditions for mosquitoes that are vectors of viruses  
73 to shelter and proliferate [17-19]. As circulating flaviviruses in city forest fragments can potentially  
74 cause disease outbreaks by infecting visitors and residents in neighboring areas, and given the lack

75 of information about flavivirus-infected mosquitoes in parks in the city of São Paulo, the aim of this  
76 study was to investigate natural flavivirus infection in mosquitoes in the Capivari-Monos EPA and  
77 identify the virus species by nucleotide sequence analysis.

78

## 79 **Material and methods**

### 80 **Study area and Mosquito Sampling**

81 The study was conducted in the Capivari-Monos EPA, an area extending over 251 km<sup>2</sup> in the  
82 Atlantic Forest in the extreme south of the city of São Paulo where sustainable use of natural resources  
83 is practiced (Fig 1). Representing around one-sixth of the area of the whole municipality and  
84 bordering on the Serra do Mar State Park, the area extends over the first hills and ocean slopes toward  
85 the upper reaches of Serra do Mar range, at altitudes varying from 740 to 800 m above sea level. It  
86 has a super-humid, tropical, ocean climate with average annual temperatures of around 19°C and  
87 rainfall of between 1,600 and 2,200 mm. The vegetation is dense, tropical, montane forest made up  
88 of Atlantic Forest remnants with different degrees of conservation, varying from well-conserved  
89 original forest to areas that have undergone a process of regeneration since 1950 and others that have  
90 been degraded recently as a result of rural and, especially, urban expansion. The district of Engenheiro  
91 Marsilac lies in the EPA and has around 10,000 inhabitants, most of whom are low-income settlers.  
92 The population density is approximately 41 inhabitants per km<sup>2</sup> [20,21].

93 Mosquito collections were carried out monthly from March 2016 to April 2017 in forested  
94 areas in Engenheiro Marsilac with different levels of anthropogenic intervention. Specimens were  
95 collected in the following areas: (1) Embura - a village surrounded by small farms and the EPA forest  
96 (23° 53.036' S/46° 44.485' W); (2) Marsilac - a village surrounded by the EPA forest and near a  
97 railway line (23° 54.395' S/46° 42.486' W); (3) Transition zone - private property near Marsilac  
98 village constituting a transitional area between a rural environment and the EPA forest (23° 54.556'  
99 S/46° 42.167' W); 4) Wild area - private property in the EPA forest next to a waterfall with a visitation  
100 area (23° 56.378' S/46° 41.659' W) (Fig 1). In each collection area two CO<sub>2</sub>-baited CDC light traps  
101 [22] with Lurex3™ were installed, one in the tree canopy (>10 meters) and another at ground level.  
102 All the traps were set up early in the afternoon and removed after 18 hours of exposure.

103

104 **Fig 1. Capivari-Monos EPA in the south of the city of São Paulo, SP, Brazil.** Collection sites are  
105 numbered as follows: (1) Embura village, (2) Marsilac village, (3) Transition zone, (4) Wild area.  
106 Green represents dense tropical forest; grey represents areas where there is human activity (villages,  
107 roads or rural properties).

108

109 Specimens were carried alive to the Entomology in Public Health Laboratory at the School of  
110 Public Health, University of São Paulo (LESP/FSP/USP), where they were morphologically  
111 identified on a specially designed chill table with a stereo microscope and the dichotomous keys  
112 described by Consoli & Lourenço-de-Oliveira [23] and Forattini [24]. Non-engorged females were  
113 grouped in pools of up to 10 individuals according to their taxonomic category and place and date of  
114 collection. A total of 260 pools of mosquitoes were obtained in this way. The pools were then  
115 transported in dry ice to the Vector-borne Diseases Laboratory, Adolfo Lutz Institute, and stored at -  
116 70°C until use.

## 117 **Detection of flaviviruses**

118 Each pool was macerated in a tube containing 1 mL of 1.8 % bovine albumin and antibiotics  
119 (100 units/mL of penicillin and 100 µL/mL of streptomycin). The resulting suspension was  
120 centrifuged at 2500 rpm for 10 min, and the supernatant was collected and frozen at -70°C. Viral  
121 isolation was performed in cell tubes seeded with monolayer cultures of C6/36 cells (*Ae. albopictus*  
122 clone) containing 1 mL of modified Leibovitz's (L-15) medium with 10 % fetal bovine serum (FBS),  
123 penicillin (100 units/mL) and streptomycin (100 µL/mL). Briefly, 100µL of the supernatant from  
124 each mosquito pool was inoculated into cell tubes after removing the medium. The cell tubes were  
125 then incubated for one hour at 28°C and slightly shaken every 15 minutes. A 1.5 mL volume of L-15  
126 medium with 2 % FBS and antibiotics was then added, and the tubes were incubated for nine days at  
127 28 °C. After incubation, the samples were analyzed by indirect immunofluorescence assay (IFA) [25]  
128 with the Saint Louis encephalitis anti-flavivirus polyclonal antibody produced at the Vector-borne  
129 Diseases Laboratory, Adolfo Lutz Institute.

## 130 **Identification of flaviviruses**

131 Positive flavivirus samples were analyzed by quantitative reverse-transcription PCR  
132 (polymerase chain reaction) (qRT-PCR) and sequenced to identify the species. Viral RNA was  
133 isolated from 140 µL aliquots of the cell-culture supernatants with the QIAamp® Viral RNA Mini  
134 Kit (Qiagen, Valencia, CA, USA) according to the manufacturer's instructions. The Pan-Flavi qRT-  
135 PCR assay previously described by Patel et al. [26] was run with the SuperScript® III Platinum®  
136 One-Step Quantitative RT-PCR System (Thermo Fisher Scientific, Waltham, MA, USA) according

137 to the manufacturer's instructions with genus-specific primers that target a 200-nucleotide region of  
138 the flavivirus NS5 gene.

139 The qRT-PCR amplicons (~260bp) were directly sequenced with the BigDye™ kit v3.1  
140 (Applied Biosystems, Inc., Foster City, CA, USA) and Flavi S and Flavi AS2 primers [26]. Dye-  
141 labeled products were sequenced with an ABI 3130 sequencer (Applied Biosystems, Inc., Foster city,  
142 CA, USA). Sequencing chromatograms were edited manually with Sequencher 4.7, and sequences  
143 were screened at the National Center for Biotechnology Information (NCBI) website with the Basic  
144 Local Alignment Search Tool (BLAST). The resulting sequences were edited manually and aligned  
145 with a set of cognate sequences of DENV and ZIKV available in GenBank (Supplementary Material  
146 Table S1) using Clustal W [27]. Minor manual adjustments to improve alignment were made with  
147 BioEdit 7.0.5.2 (Ibis Therapeutics, USA). Neighbor Joining (NJ) trees were constructed with the  
148 Kimura 2-parameter model determined by MEGA 6.0 with 1,000 bootstrap replicates [28]. Prototype  
149 ZIKV and DENV sequences (Table S1), available in GenBank, were added to the corresponding tree  
150 so that species identity could be confirmed.

151 Nucleotide sequences determined in this study were deposited in GenBank under accession  
152 numbers MK134005, MK134006, MK371391, MK371392 and MK371393.

153

## 154 **Results**

155 In total, 878 specimens of Culicidae belonging to 37 taxa (11 genera) were sampled (Table  
156 S2), of which 99.8% were female and 0.2% male. Most of the specimens were collected in the canopy  
157 (54.1%), 41.1% were collected at ground level and for 4.8% information on stratification was not  
158 available. The species *An. (Ker.) cruzii*, (171 specimens), *Wy. (Prl.) confusa* (134), *Cx. (Cux.)* spp.  
159 (109), *Li. durhami* (61), *Cx. (Mel.) vaxus* (36) and *Wy. (Pho.) theobaldi* (58) were the most common  
160 species collected. More mosquitoes (61.4%) were collected in the wild area than in the transition zone  
161 (14.9%), Embura (13.1%) and Marsilac (8.7%).

162 qRT-PCR detected flavivirus RNA in 1.9% of the pools (5/260) of non-engorged females.  
163 RNAs from all the five flavivirus-positive pools were successfully sequenced, and the species were  
164 identified by comparing the 243-269 bp fragment of the partial NS5 gene with corresponding  
165 sequences from GenBank. DENV serotype 2 (DENV2) sequences were identified in *Cx.* spp. and *Cx.*  
166 *vaxus* pools, and ZIKV sequences in *An. cruzii*, *Li. durhami* and *Wy. confusa* pools. Flavivirus-  
167 positive samples were found in two areas in the EPA: wild area and transition zone (Table 1).

168

169

170 **Table 1. Descriptions of flavivirus positive pools.**

| Pool       | Date   | Location        | Taxon              | N  | Stratification | Viral RNA | Fragment Size (bp) | Isolate          | GenBank accession no. |
|------------|--------|-----------------|--------------------|----|----------------|-----------|--------------------|------------------|-----------------------|
| 168 14P-F  | Oct/16 | Wild area       | <i>Cx. spp.</i>    | 6  | Canopy         | DENV-2    | 243                | Flavi-168-DENV-2 | MK134006              |
| 143 9P-C   | Feb/17 | Wild area       | <i>Cx. vaxus</i>   | 4  | Canopy         | DENV-2    | 255                | Flavi-143-DENV-2 | MK134005              |
| 148 11P-A  | Feb/17 | Transition zone | <i>Li. durhami</i> | 6  | Ground         | ZIKV      | 242                | Flavi-148- ZIKV  | MK371391              |
| 157 14P-A2 | Oct/16 | Wild area       | <i>An. cruzii</i>  | 10 | Canopy         | ZIKV      | 268                | Flavi-157- ZIKV  | MK371393              |
| 150 12P-A  | Feb/17 | Transition zone | <i>Wy. confusa</i> | 2  | Canopy         | ZIKV      | 269                | Flavi-150- ZIKV  | MK371392              |

171 Descriptions of flavivirus positive pools according to name, collection date, collection site, taxon, number of  
172 specimens, stratification, viral RNA identified, fragment size, isolate and GenBank accession number.

173

174 The phylogenetic trees (Figs 2 and 3), which were constructed to confirm the species/serotype  
175 of the flaviviruses, include sequences from the isolates in this study (in bold) together with prototype  
176 sequences from GenBank obtained using BLAST.

177

178 **Fig 2. Neighbor-Joining (NJ) similarity tree.** For the DENV-2 partial NS5 gene nucleotide  
179 sequences generated with MEGA 6.0. DENV-1, DENV-2, DENV-3 and DENV-4 sequences were  
180 obtained from GenBank. The species and accession number of each isolate are indicated. Table S1  
181 gives information about each isolate. The scale indicates genetic diversity. The numbers at the nodes  
182 represent percentage bootstrap values.

183

184 **Fig 3. Neighbor-Joining (NJ) similarity tree.** For the partial NS5 gene nucleotide sequences of the  
185 Flavi-148-ZIKV, Flavi-150-ZIKV and Flavi-157-ZIKV isolates generated with MEGA 6.0.  
186 Reference ZIKV sequences were obtained from GenBank. The species and accession number of each  
187 isolate are indicated. Table S1 gives information about each isolate. The scale indicates genetic  
188 diversity. The numbers at the nodes represent percentage bootstrap values.

189

190

191 The DENV tree confirmed the identification of isolates Flavi-143-DENV-2 and Flavi-168-  
192 DENV-2 as DENV-2 as they form a well-supported monophyletic group with the sequences from  
193 GenBank (Fig. 2). These two isolates showed a nucleotide (nt) identity of 94.1% with each other.  
194 Genetic analysis of the NS5 partial gene sequences revealed that the DENV-2 isolates identified in  
195 the present study had high nt similarity with human DENV-2 isolated in Cuba in 1981 (DENV2-  
196 Cuba-A169-1981), in China in 2015 (DENV2-China-SZ-2015) and in New Guinea in 1944 (DENV2-  
197 New-Guinea-C-1944) but low nt similarity with Brazilian human BID-V2377 isolated in 2000.



198 A nucleotide sequence identity of 99.6% was found when Flavi-148-ZIKV, Flavi-150-ZIKV  
199 and Flavi-157-ZIKV were compared with each other. Phylogenetic analysis of the partial NS5 gene  
200 sequences showed that these three isolates exhibited high nt similarity (97.0% to 98.1%) with other  
201 ZIKV viruses that have been isolated from humans, *Aedes* mosquitoes and non-human primates in  
202 the Americas since 2015. Three distinct ZIKV groups, from the Americas, Asia and Africa, can be  
203 observed in Fig. 3.

204

## 205 **Discussion**

206 The finding reported here of sylvatic mosquitoes naturally infected with the DENV-2 and  
207 ZIKV flaviviruses for the first time in Brazil suggests that these two urban arboviruses are circulating  
208 in wild areas. Both DENV-2 and ZIKV originated in wild areas and settled in urban areas, causing a  
209 major impact on human health [29-31]. The presence of circulating flaviviruses in the Capivari-  
210 Monos EPA may indicate that an enzootic cycle involving vector mosquitoes and hosts (birds and  
211 mammals) has been maintained in this area and is likely contributing to transmission of these viruses,  
212 creating additional difficulties for disease control in the area.

213 The spread of arboviruses is directly related to the geographic expansion of their vector  
214 mosquitoes and vertebrate hosts and is very dependent on the virus-vector-host relationships [6,32].  
215 Terzian et al. [33] detected ZIKV in non-human primates (NHPs) in urban and periurban areas in a  
216 city in the state of São Paulo and a few cities in the state of Minas Gerais, Brazil, suggesting that  
217 NHPs may be the vertebrate hosts responsible for circulation of ZIKV in these two states. The greatest  
218 diversity of Culicidae in Brazil is probably found in the Atlantic Forest [18], and several remnants of  
219 the Atlantic Forest can be found in various areas of the city of São Paulo, ranging from urban parks  
220 to conservation units. Conservation units farthest from the city center tend to be more preserved and  
221 consequently have greater mosquito diversity [18,34]. While the Capivari-Monos EPA is still a well-  
222 preserved area, it has recently undergone anthropic modifications that have led to fragmentation of  
223 the landscape [17,34].

224 Many studies have reported the presence of mosquitoes that are considered important  
225 flavivirus vectors in fragments of the Atlantic Forest in various areas in the city of São Paulo [18,34-  
226 36] and state of São Paulo [4,37,38], but natural flavivirus infection in these mosquitoes had not been  
227 detected prior to the present study. This is also the first report of mosquitoes naturally infected with  
228 flaviviruses in a conservation unit in the city of São Paulo. Unexpectedly, five species of mosquitoes  
229 (0.6%) not incriminated as flavivirus vectors were found to be naturally infected with species of genus



230 *Flavivirus* in the study area. Most were collected in the canopy, including *An. cruzii*, *Cx. spp.*, *Cx.*  
231 *vaxus* and *Wy. confusa*, but *Li. durhami* specimens were collected at ground level only.

232 *Culex vaxus* appears to retain behavioral characteristics typical of wild mosquitoes as it has  
233 been shown to adapt poorly to areas with reduced forest [39]. Information about this species is still  
234 quite scarce, and most of the available information is generally related to members of subgenus  
235 *Melanoconion*, to which this mosquito belongs. The species of this subgenus can develop in a wide  
236 range of breeding sites, from large natural water bodies, such as lakes, to small water retainers, such  
237 as bromeliads and artificial containers. They have eclectic feeding habits and can participate in natural  
238 arbovirus cycles [23-24]. Some species of the subgenus have been proven to be involved in the  
239 transmission cycle of arboviruses. *Culex (Mel.) pedroi* has been found naturally infected mainly by  
240 eastern equine encephalitis virus (EEEV) and western equine encephalitis virus (WEEV) and is a  
241 potential vector of Venezuelan equine encephalitis virus (VEEV) (*Alphavirus*). *Culex spissipes* is a  
242 potential vector for VEEV, Caraparu virus and other species of *Orthobunyavirus*. In addition, *Cx.*  
243 *portesi* may be involved in the Mucambo virus (*Alphavirus*) cycle in northeastern South America  
244 [24,40-42]. However, there have to date been no reports of *Cx. vaxus* infected naturally with species  
245 of genus *Flavivirus*. Of particular significance in the present study was the unexpected detection of  
246 *Cx. vaxus* naturally infected with DENV-2. Among dengue virus serotypes, DENV-2 is the most  
247 aggressive and most frequent circulating in Brazil and is currently responsible for 54.3 % of infections  
248 [43].

249 Mosquitoes of the *Culex* subgenus *Culex* develop in different breeding sites and feed on birds  
250 and mammals [24]. São Paulo metropolitan region is infested with *Cx. quinquefasciatus* as open-air  
251 breeding sites with high organic-matter content, such as the Pinheiros river, provide optimal  
252 conditions for the development and proliferation of this highly anthropophilic species, an  
253 opportunistic, cosmopolitan mosquito that has humans as its main host and feeds at night [44,45]. In  
254 the present study, DENV-2 was found in one of the positive pools of mosquitoes identified as *Cx.*  
255 *spp.* Although some species of genus *Culex* have been found to carry viruses in wild environments,  
256 Consoli & Lourenço-de-Oliveira [23] pointed out that the epidemiological importance of these  
257 species cannot be compared to that of *Cx. quinquefasciatus* in urban environments. To investigate  
258 ZIKV replication in *Cx. quinquefasciatus*, Guedes et al. [46] fed mosquitoes from Recife, Brazil,  
259 artificially and investigated the presence of ZIKV in their midgut, salivary glands and saliva. They  
260 demonstrated that *Cx. quinquefasciatus* is a competent vector for ZIKV, disagreeing with the findings  
261 of Lourenço-de-Oliveira et al. [47], who showed that these mosquitoes neither support replication of  
262 ZIKV nor play a role in transmission of this virus. Moreover, our study has demonstrated that other

263 species of the *Culex* genus have vector competence for DENV-2. Hence, further studies of *Cx.*  
264 *quinquefasciatus* and other species of the genus are needed to clarify this issue.

265 *Anopheles cruzii* is generally restricted to the Brazilian coast, from the Northeast to South,  
266 following the original distribution of the Atlantic Forest. The high abundance of this species is  
267 directly related to the high availability of natural breeding sites. The species breeds mainly in  
268 epiphytic or terrestrial bromeliads, and the relative humidity on coastal slopes and plentiful shade  
269 under the forest canopy favor its adaptation to this environment. The abundance of this mosquito can  
270 also be attributed to its opportunistic behavior and eclectic feeding habits [23,24]. It is considered the  
271 species most associated with the transmission of human and simian *Plasmodium* in the Atlantic  
272 Forest, causing a type of malaria known as “bromeliad malaria”, so called because the immature  
273 forms of the mosquito develop in the water that accumulates in bromeliads. Although anophelines  
274 are usually known for transmitting malaria [50], some species have been found infected with  
275 arboviruses. Epelboin et al. [51] pointed out that *An. cruzii* is also responsible for transmitting  
276 O'nyong-nyong virus (*Alphavirus*), which is closely related to CHIKV. It is noteworthy that *An. cruzi*  
277 was also found naturally infected with the Iguape virus (a flavivirus) in 1994 in Juquitiba, SP [52].  
278 Using artificial infection, Dodson & Rasgon [53] demonstrated that *An. gambiae* and *An. stephensi*  
279 are refractory to ZIKV infection. In addition, two species of genus *Anopheles*, *An. coustani* and *An.*  
280 *gambiae*, were found naturally infected with ZIKV in Africa [51]. However, there are to our  
281 knowledge no reports of *An. cruzii* naturally or artificially infected with ZIKV in the literature. This  
282 study can therefore be considered the first report of *An. cruzii* naturally infected with ZIKV in a  
283 conservation unit in the city of São Paulo.

284 The species *Wy. confusa* and *Li. durhami* belong to the Sabethini tribe and have close  
285 phylogenetic relationships. *Wyeomyia confusa* feeds during the day and is most commonly found at  
286 ground level but can also feed in the canopy. It is an opportunistic, eclectic species and frequently  
287 bites humans. Although it is usually sylvatic and breeds mainly in bromeliads, in this study *Wy.*  
288 *confusa* was observed in environments with greater anthropic interventions, such as Embura and the  
289 transition area, and was also found carrying ZIKV. Although this mosquito has already been found  
290 infected with arboviruses in wild environments, there is a dearth of information about its medical  
291 importance in the literature [24].

292 Even though *Li. durhami* is a sylvatic species, it is the species of the tribe Sabethini which  
293 best adapts to anthropic environments. It has been found frequently and abundantly in natural and  
294 artificial breeding sites that have undergone anthropic changes, usually where there is shady  
295 vegetation [23]. This mosquito bites actively throughout the day and feeds on birds and mammals at  
296 ground level. There have been reports of *Li. durhami* carrying the Guama, Tucunduba and Maguari

297 viruses (*Orthobunyavirus*) [54]. Harbach [55] pointed out that although mosquitoes of the genus  
298 *Limatus* have been found with the *Wyeomyia* virus in Trinidad and the species *Li. flavisetosus* has  
299 been found with VEEV, it is unlikely that species of this genus are of epidemiological or even  
300 economic importance. However, in our study *Li. durhami* was detected carrying ZIKV. Although this  
301 is only the first such report worldwide, the importance of ZIKV for public health makes further studies  
302 of this species essential. It should be highlighted that the ZIKV identified here in three different  
303 mosquito species exhibited high nucleotide similarity with the other ZIKV isolates reported to date  
304 in the Americas.

305 Other mosquito species found infected with DENV include *Haemagogus leucocelaenus*  
306 (DENV-1), *Aedes albopictus* (DENV-3) [56], *Ae. aegypti* (DENV-1, DENV-2, DENV-3 and DENV-  
307 4) [57,58] and *Cx. quinquefasciatus* (DENV-4) [57]; species infected with ZIKV include *Ae. aegypti*  
308 [59, 60], *Cx. quinquefasciatus* and *Armigeres subalbatus* [60]. *Aedes aegypti*, considered the main  
309 vector of DENV and ZIKV in Brazil and other parts of the world [16,58], was not found in the  
310 Capivari-Monos EPA, probably because this species is an urban mosquito and the collection sites  
311 were in wild environments. *Aedes albopictus* was also sampled but tested negative for flaviviruses.  
312 The species is a potential vector of flaviviruses and many other arboviruses in some parts of the world  
313 [3,15]. Kucharz & Cebula-Byrska [61] note that *Ae. albopictus* can be a competent vector in regions  
314 where *Ae. aegypti* is not found in abundance.

315 Here we found sylvatic mosquitoes naturally infected with flaviviruses in an environmental  
316 protection area, the Capivari-Monos EPA. This finding may have implications for arbovirus  
317 surveillance programs as vector-borne DENV-2 and ZIKV transmission may occur in wild  
318 environments as well as urban areas. Further entomological surveillance studies are required to  
319 understand the potential role of these mosquitoes in maintaining the DENV-2 and ZIKV enzootic  
320 cycles and to elucidate how transmission cycles originated in the Capivari-Monos EPA would spread  
321 to other regions of the city. Surveillance activities typically include identification and laboratory  
322 confirmation of circulating arboviruses isolated from suspected cases of infection, as well as  
323 identification of the potential vector and monitoring of infestation rates for this vector. Reducing  
324 mortality due to flaviviruses depends on early detection of infection, an integrated surveillance system  
325 and a network for the provision of appropriate care and guidance during outbreaks and epidemics.

326

## 327 **Conclusion**

328 This study reports the first isolation of flaviviruses from naturally infected mosquitoes  
329 collected in the Capivari-Monos EPA in the city of São Paulo, Brazil. *Culex*. spp. and *Cx. vaxus* were

330 found infected with DENV-2, and *An. cruzii*, *Li. durhami* and *Wy. confusa* with ZIKV. These five  
331 mosquitoes were also the most abundant species collected. Considering the medical importance of  
332 *An. cruzii*, the main vector of bromeliad malaria in the Southeast of Brazil, it is imperative that further  
333 studies be carried out to investigate whether this species plays a role in ZIKV transmission. In  
334 addition, although there is to date no evidence that *Cx. spp.*, *Cx. vaxus*, *Li. durhami* or *Wy. confusa*  
335 are of epidemiological importance, the fact that they were found infected with flaviviruses in this  
336 study means that they should be included in studies to investigate the flavivirus vector competence  
337 and capacity of these species and their potential to contribute to future dengue and Zika outbreaks  
338 and epidemics.

339

## 340 Acknowledgments

341 We would like to express our gratitude to the following members of the field and laboratory  
342 teams at the Superintendency for the Control of Endemic Diseases, São Paulo Zoonosis Control  
343 Center, and the School of Public Health, São Paulo University: Dr. Ana Maria Ribeiro de Castro  
344 Duarte, João Carlos do Nascimento, Paulo Frugoli dos Santos, Luis Milton Bonafé, Antônio  
345 Waldomiro de Oliveira, Laércio Molinari, Gabriel Marcelino Neto, Luiz Sposito Jr, Renildo Souza  
346 Teixeira, Daniel Pagotto Vendrami, Laura Cristina Multini, Gabriela Cristina de Carvalho, Ramon  
347 Wilk da Silva, Rafael de Oliveira Christe, Eduardo Evangelista de Souza, Amanda Alves Camargo  
348 and Ana Leticia da Silva de Souza.

349

## 350 References

- 351 1. World Health Organization. Neglected tropical diseases. Mosquito-borne diseases.  
352 [https://www.who.int/neglected\\_diseases/vector\\_ecology/mosquito-borne-diseases/en/](https://www.who.int/neglected_diseases/vector_ecology/mosquito-borne-diseases/en/).  
353 Accessed 02 Dec 2018.
- 354 2. World Health Organization. Vector-borne diseases.  
355 <http://www.who.int/mediacentre/factsheets/fs387/en/>. Accessed 06 Dec 2018.
- 356 3. Lima-Camara TN. Emerging arboviruses and public health challenges in Brazil. *Rev Saude*  
357 *Publica*. 2016;50:36.
- 358 4. Cunha MS, Costa AC, Fernandes NCCA, Guerra JM, Santos FCP, Nogueira JS, et al. Epizootics  
359 due to Yellow Fever Virus in São Paulo state, Brazil: viral dissemination to new areas (2016–  
360 2017). *Sci Rep*. 2019; doi:10.1038/s41598-019-41950-3.
- 361 5. Aagaard-Hansen J, Nombela N, Alvar J. Population movement: a key factor in the epidemiology  
362 of neglected tropical diseases. *Trop Med Int Health*. 2010;15:1281-88.
- 363 6. Weaver SC, Reisen WK. Present and future arboviral threats. *Antiviral Res*. 2010;85:328-45.
- 364 7. Teich V, Arinelli R, Fahham L. *Aedes aegypti* and society: the economic burden of arbovirus in  
365 Brazil. *J Bras Econ Saude*. 2017;9:267-76.

- 366 8. Figueiredo LTM. The Brazilian flaviviruses. *Microbes Infect.* 2000;2:1643-9.
- 367 9. Rocco IM, Santos CLS, Bisordi I, Petrella SMCN, Pereira LE, Souza RP, et al. St. Louis  
368 Encephalitis Virus: first isolation from a human in São Paulo state, Brazil. *Rev Inst Med Trop*  
369 *Sao Paulo.* 2005;47:281-5.
- 370 10. Batista WC, Tavares GSB, Vieira DS, Honda ER, Pereira SS, Tada MS. Notification of the first  
371 isolation of Cacipacore virus in a human in State of Rondônia, Brazil. *Rev Soc Bras Med*  
372 *Trop.* 2011;44:528-30.
- 373 11. Pauvolid-Corrêa A, Kenney JL, Couto-Lima D, Campos ZMS, Schatzmayr HG, Nogueira RMR,  
374 et al. Ilheus virus isolation in the Pantanal, West-Central Brazil. *Plos Negl Trop Dis.* 2013;7:7.
- 375 12. Pan American Health Organization. Casos Reportados de Dengue en Las Americas. Washington,  
376 D.C. 2019. [https://www.paho.org/data/index.php/es/temas/indicadores-dengue/dengue-](https://www.paho.org/data/index.php/es/temas/indicadores-dengue/dengue-nacional/9-dengue-pais-ano.html)  
377 [nacional/9-dengue-pais-ano.html](https://www.paho.org/data/index.php/es/temas/indicadores-dengue/dengue-nacional/9-dengue-pais-ano.html). Accessed 30 Oct 2019.
- 378 13. Fauci AS, Morens DM. Zika virus in the Americas - yet another arbovirus threat. *N Engl J Med.*  
379 2016;374:601-4.
- 380 14. Faria NR, Azevedo RSS, Kraemer MUG, Souza RP, Cunha MS, Hill SC, Thézé J, et al. Zika  
381 virus in the Americas: early epidemiological and genetic findings. *Science.* 2016;352:345-9.
- 382 15. Yun SI, Lee YM. Zika virus: an emerging flavivirus. *J Microbiol.* 2017;55:204-19.
- 383 16. Donalisio MR, Freitas ARR, Zuben APBV Arboviruses emerging in Brazil: challenges for clinic  
384 and implications for public health. *Rev Saude Publica.* 2017;51:30.
- 385 17. Ribeiro AF, Urbinatti PR, Duarte AMRC, Paula MB, Pereira DM, Mucci LF, et al. Mosquitoes  
386 in degraded and preserved areas of the Atlantic Forest and potential for vector-borne disease  
387 risk in the municipality of São Paulo, Brazil. *J Vector Ecol.* 2012; 37:316-24.
- 388 18. Medeiros-Sousa AR, Fernandes A, Ceretti-Junior W, Wilke ABB, Marrelli MT. Mosquitoes in  
389 urban green spaces: using an island biogeographic approach to identify drivers of species  
390 richness and composition. *Sci Rep.* 2017; doi:10.1038/s41598-017-18208-x.
- 391 19. Fernandes LN, Paula MB, Araújo AB, Gonçalves EFB, Romano CM, Natal D, et al. Detection of  
392 *Culex flavivirus* and *Aedes flavivirus* nucleotide sequences in mosquitoes from parks in the  
393 city of São Paulo, Brazil. *Acta Trop.* 216;157:73-83.
- 394 20. Tarifa JR, Armani G. Os climas “naturais”. In: Tarifa J, Azevedo TR, Editors. Os climas da cidade  
395 de São Paulo: Teoria e Pratica. São Paulo: GEOUSP; 2001. p. 34-70.
- 396 21. Secretaria Municipal do Verde e do Meio Ambiente. Plano de Manejo – APA Capivari-Monos.  
397 [https://www.prefeitura.sp.gov.br/cidade/secretarias/meio\\_ambiente/publicacoes\\_svma/index](https://www.prefeitura.sp.gov.br/cidade/secretarias/meio_ambiente/publicacoes_svma/index.php?p=26341/planodemanejo-apacapivari-monos)  
398 [.php?p=26341/planodemanejo-apacapivari-monos](https://www.prefeitura.sp.gov.br/cidade/secretarias/meio_ambiente/publicacoes_svma/index.php?p=26341/planodemanejo-apacapivari-monos). Accessed 21 Feb 2018.
- 399 22. Gomes AC, Rabello EX, Natal D. A new collecting chambre for a CDC-miniature trap. *Rev Saude*  
400 *Publica.* 1985;19:190-1.
- 401 23. Consoli, RAGB, Lourenço-de-Oliveira R. Principais mosquitos de importância sanitária no  
402 Brasil. 1st ed. Rio de Janeiro: FIOCRUZ; 1994.
- 403 24. Forattini OP. Culicidologia Médica. 1st ed. São Paulo: EDUSP; 2002.
- 404 25. Gubler DG, Kuno G, Sather GE, Velez M, Oliver A. Mosquito cell cultures and specific  
405 monoclonal antibodies in surveillance of dengue virus. *Am J Trop Med Hyg.* 1984;33:158-  
406 65.



- 407 26. Patel P, Landt O, Kaiser M, Faye O, Koppe T, Lass U, et al. Development of one-step quantitative  
408 reverse transcription PCR for the rapid detection of flaviviruses. *Virology*. 2013;10:58.
- 409 27. Thompson JD, Higgins DG, Gibson TJ. Clustal W: improving the sensitivity of progressive  
410 multiple sequence alignment through sequence weighting, position-specific gap penalties  
411 and weight matrix choice. *Nucleic Acids Res.* 1994;22:4673-80.
- 412 28. Tamura K, Stecher G, Peterson D, Filipski A, Kumar S. Mega 6: molecular evolutionary genetics  
413 analysis version 6.0. *Mol Biol Evol.* 2013;30:2725–29.
- 414 29. Dick GWA, Kitchen SF, Haddock AJ. Zika Virus. I. Isolations and serological specificity. *Trans  
415 R Soc Trop Med Hyg.* 1952;46:509-20.
- 416 30. Gubler DJ. Dengue and dengue hemorrhagic fever. *Clin Microbiol Rev.* 1998;11:480-96.
- 417 31. Hayes EB. Zika virus outside Africa. *Emerg Infect Dis.* 2009;15:1347-50.
- 418 32. Gubler DJ. Human arbovirus infections worldwide. *Ann N Y Acad Sci;* 2001;951:13-24.
- 419 33. Terzian ACB, Zini N, Sacchetto L, Rocha RF, Parra MCP, Sarto JLD, et al. Evidence of natural  
420 Zika virus infection in neotropical non-human primates in Brazil. *Sci Rep.* 2018; doi:  
421 10.1038/s41598-018-34423-6
- 422 34. Medeiros-Sousa AR, Christie, RO, Duarte AMRC, Mucci LF, Ceretti-Junior W, Marrelli MT.  
423 Effects of anthropogenic landscape changes on the abundance and acrodendrophily of  
424 *Anopheles (Kerteszia) cruzii*, the main vector of malaria parasites in the Atlantic Forest in  
425 Brazil. *Malar J.* 2019;18:110.
- 426 35. Mucci LF, Medeiros-Sousa AR, Ceretti-Júnior W, Fernandes A, Camargo AA, Evangelista E, et  
427 al. *Haemagogus leucocelaenus* and other mosquito potentially associated with sylvatic  
428 Yellow Fever in Cantareira State Park in São Paulo metropolitan area, Brazil. *J Am Mosq  
429 Control Assoc.* 2016;32:329-32.
- 430 36. Urbinatti PR, Sendacz S, Natal D. Immature of mosquitoes (Diptera: Culicidae) in a public city  
431 park. *Rev Saude Publica.* 2001;35:461-6.
- 432 37. Iversson LB. Situação atual do conhecimento eco-epidemiológico sobre arbovírus patogênicos  
433 para o homem na região da Mata Atlântica do Estado de São Paulo. *Rev Inst Med Trop São  
434 Paulo.* 1994;36:343-53.
- 435 38. Ferreira IB, Pereira LE, Rocco IM, Marti AT, Souza LTM, Iversson LB. Surveillance of arbovirus  
436 infections in the Atlantic Forest region, State of São Paulo, Brazil: I. Detection of  
437 hemagglutination-inhibition antibodies in wild birds between 1978 and 1990. *Rev Inst Med  
438 Trop São Paulo.* 1994;36:265-74.
- 439 39. Lopes J, Lozovei AL. Mosquito (Diptera: Culicidae) ecology of natural and artificial rural  
440 breeding places at North Paraná State, Brazil. I - Collections in a bed-streamlet. *Rev Saude  
441 Publica.* 1995;29:183-91.
- 442 40. Aitken THG. Habits of some mosquito hosts of VEE (Mucambo) virus from northeastern South  
443 America, including Trinidad. In: *Proceedings of the Workshop Symposium on Venezuelan  
444 Encephalitis Virus.* Washington, D.C, Pan American Health Organization (PAHO). Scientific  
445 Publ. 1972;243:254-6.
- 446 41. Ferro C, Olano VA, Ahumada M, Weaver S. Mosquitos (Diptera: culicidae) in the small village  
447 where a human case of Venezuelan Equine Encephalitis was recorded. *Biomedica.*  
448 2008;28:234-44.

- 449 42. Shope RE, Woodhall JP, Travassos da Rosa A. The epidemiology of diseases caused by viruses  
450 in groups C and Guama (Bunyaviridae). In: Monath TP, editor. The arboviruses: epidemiology  
451 and ecology. Boca Raton: CRC Press; 1988. p. 37-52.
- 452 43. Brasil. Ministério da Saúde/Secretaria de Vigilância em Saúde. Monitoramento dos casos de  
453 dengue, febre de chikungunya e febre pelo vírus Zika até a Semana Epidemiológica 5 de 2018.  
454 In: Boletim Epidemiológico. 2018.  
455 [https://portalarquivos2.saude.gov.br/images/pdf/2018/fevereiro/20/2018-](https://portalarquivos2.saude.gov.br/images/pdf/2018/fevereiro/20/2018-007.pdf/monitoramentodoscasosdedengue,febredechikungunyaefebrepeloviruszikaateasema)  
456 [007.pdf/monitoramentodoscasosdedengue,febredechikungunyaefebrepeloviruszikaateasema](https://portalarquivos2.saude.gov.br/images/pdf/2018/fevereiro/20/2018-007.pdf/monitoramentodoscasosdedengue,febredechikungunyaefebrepeloviruszikaateasema)  
457 [naepidemiologica5de2018](https://portalarquivos2.saude.gov.br/images/pdf/2018/fevereiro/20/2018-007.pdf/monitoramentodoscasosdedengue,febredechikungunyaefebrepeloviruszikaateasema). Accessed 15 Jan 2019.
- 458 44. Forattini OP, Ishiata GK, Rabello EX, Cotrim MD. Observations on *Culex* mosquitoes of São  
459 Paulo city, Brazil. Rev Saude Publica. 1973;7:315-30.
- 460 45. Morais SA, Marrelli MT, Natal D. Aspectos da distribuição de *Culex* (*Culex*) *quinquefasciatus*  
461 Say (Diptera: culicidae) na região do rio Pinheiros, na cidade de São Paulo, Estado de São  
462 Paulo, Brasil. Rev Bras Entomol 2006;50:413-18.
- 463 46. Guedes DRD, Paiva MHS, Donato MMA, Barbosa PP, Krokovsky L, Rocha SWS, et al. Zika  
464 virus replication in the mosquito *Culex quinquefasciatus* in Brazil. Emerg Microbes Infect.  
465 2017; doi: 10.1038/emi.2017.59.
- 466 47. Lourenço-de-Oliveira R, Marques JT, Sreenu VB, Nten CA, Aguiar ERGR, Varjak M, et al. *Culex*  
467 *quinquefasciatus* mosquitoes do not support replication of Zika virus. J Gen Virol. 2018;  
468 99:258-64.
- 469 48. Pina-Costa A, Brasil P, Di Santi SM, Araújo MP, Suárez-Mutis MC, Santelli ACFS, et al. Malaria  
470 in Brazil: What happens outside the Amazonian endemic region. Mem Inst Oswaldo Cruz.  
471 2014;109:618-33.
- 472 49. Laporta GZ, Sallum MAM. Coexistence mechanisms at multiple scales in mosquito assemblages.  
473 BMC Ecol. 2014;14:30.
- 474 50. Deane LM, Ferreira Neto JA, Deane SP, Silveira IP. *Anopheles* (*Kerteszia*) *cruzei*, a natural vector  
475 of the monkey malaria parasites, *Plasmodium simium* and *Plasmodium brasilianum*. Trans R  
476 Soc Trop Med Hyg. 1970;64:647.
- 477 51. Epelboin Y, Talaga S, Epelboin L, Dusfour I. Zika virus: an updated review of competent or  
478 naturally infected mosquitoes. PLoS Negl Trop Dis. 2017;11:1-22.
- 479 52. Bocato-Chamelet EL, Coimbra TLM, Nassar ES, Pereira LE, Ferreira IB, Souza LTM, et al.  
480 Isolation of flavivirus Iguape from mosquitoes *Anopheles* (*Kerteszia*) *cruzei* in Juquitiba, São  
481 Paulo State, Brazil. Rev Inst Adolfo Lutz. 2001;60:65-9.
- 482 53. Dodson BL, Rasgon JL. Vector competence of *Anopheles* and *Culex* mosquitoes for Zika virus.  
483 PLoS Negl Trop Dis. 2017;5:e3096.
- 484 54. Segura MNO, Castro FC. Características específicas de insetos hematófagos da família Culicidae.  
485 In: Atlas de Culicídeos na Amazônia Brasileira. 2007.  
486 [http://iah.iec.pa.gov.br/iah/fulltext/pc/monografias/iec/atlasculicideos/atlaslayout2007.pdf/ca](http://iah.iec.pa.gov.br/iah/fulltext/pc/monografias/iec/atlasculicideos/atlaslayout2007.pdf/caracteristicasespecificasdeinsetohematofagosdafamiliaculicidae)  
487 [racteristicasespecificasdeinsetohematofagosdafamiliaculicidae](http://iah.iec.pa.gov.br/iah/fulltext/pc/monografias/iec/atlasculicideos/atlaslayout2007.pdf/caracteristicasespecificasdeinsetohematofagosdafamiliaculicidae). Accessed 21 Jan 2019.
- 488 55. Harbach R. *Limatus*. In: Mosquito taxonomic inventory. 2008. [http://mosquito-taxonomic-](http://mosquito-taxonomic-inventory.info/valid-species-list#/limatus)  
489 [inventory.info/valid-species-list#/limatus](http://mosquito-taxonomic-inventory.info/valid-species-list#/limatus). Accessed 21 Feb 2018.
- 490 56. Figueiredo MLG, Gomes AC, Amarilla AA, Leandro As, Orrico AS, Araujo RF, et al. Mosquitoes  
491 infected with dengue viruses in Brazil. Virology J. 2010;7:152.



- 492 57. Serra OP, Cardoso BF, Ribeiro ALM, Santos FAL, Shessarenko RD. Mayaro virus and dengue  
493 virus 1 and 4 natural infection in culicids from Cuiabá, State of Mato Grosso, Brazil. Mem  
494 Inst Oswaldo Cruz. 2016;11:20-9.
- 495 58. Ferreira-de-Lima VH, Lima-Camara TM. Natural vertical transmission of dengue virus in *Aedes*  
496 *aegypti* and *Aedes albopictus*: a systematic review. Parasit Vectors. 2018;11:77.
- 497 59. Marchette NJ, Garcia R, Rudnick A. Isolation of Zika virus from *Aedes aegypti* mosquitoes in  
498 Malaysia. Am J Trop Med Hyg. 1969;18:411-15.
- 499 60. Phumee A, Buathong R, Boonserm R, Intayot P, Aungsananta N, Jittmittraphap A, et al.  
500 Molecular epidemiology and genetic diversity of Zika virus from field-caught mosquitoes in  
501 various regions of Thailand. Pathogens. 2019;8:30.
- 502 61. Kucharz EJ, Cebula-Byrska I. Chikungunya fever. Eur J Intern Med. 2012;23:325–9.  
503  
504

505 **Supporting information**

506

507 **S1 Table. Reference sequences of dengue and Zika viruses from GenBank.** Sequences of dengue  
508 and Zika viruses from GenBank aligned to construct a phylogenetic tree by country of origin, isolate,  
509 year, origin of isolated material, genome sequence and GenBank accession number.

510 **S2 Table. Mosquito species collected in the Capivari-Monos Environmental Protection Area**  
511 **(EPA).** Mosquito species collected in the Capivari-Monos EPA according to the number of  
512 individuals at each study point, stratification, sex and number of pools. Mosquitoes collected from  
513 March 2016 to April 2017.

514

515

516

517

518

519

520

521

522

523

524

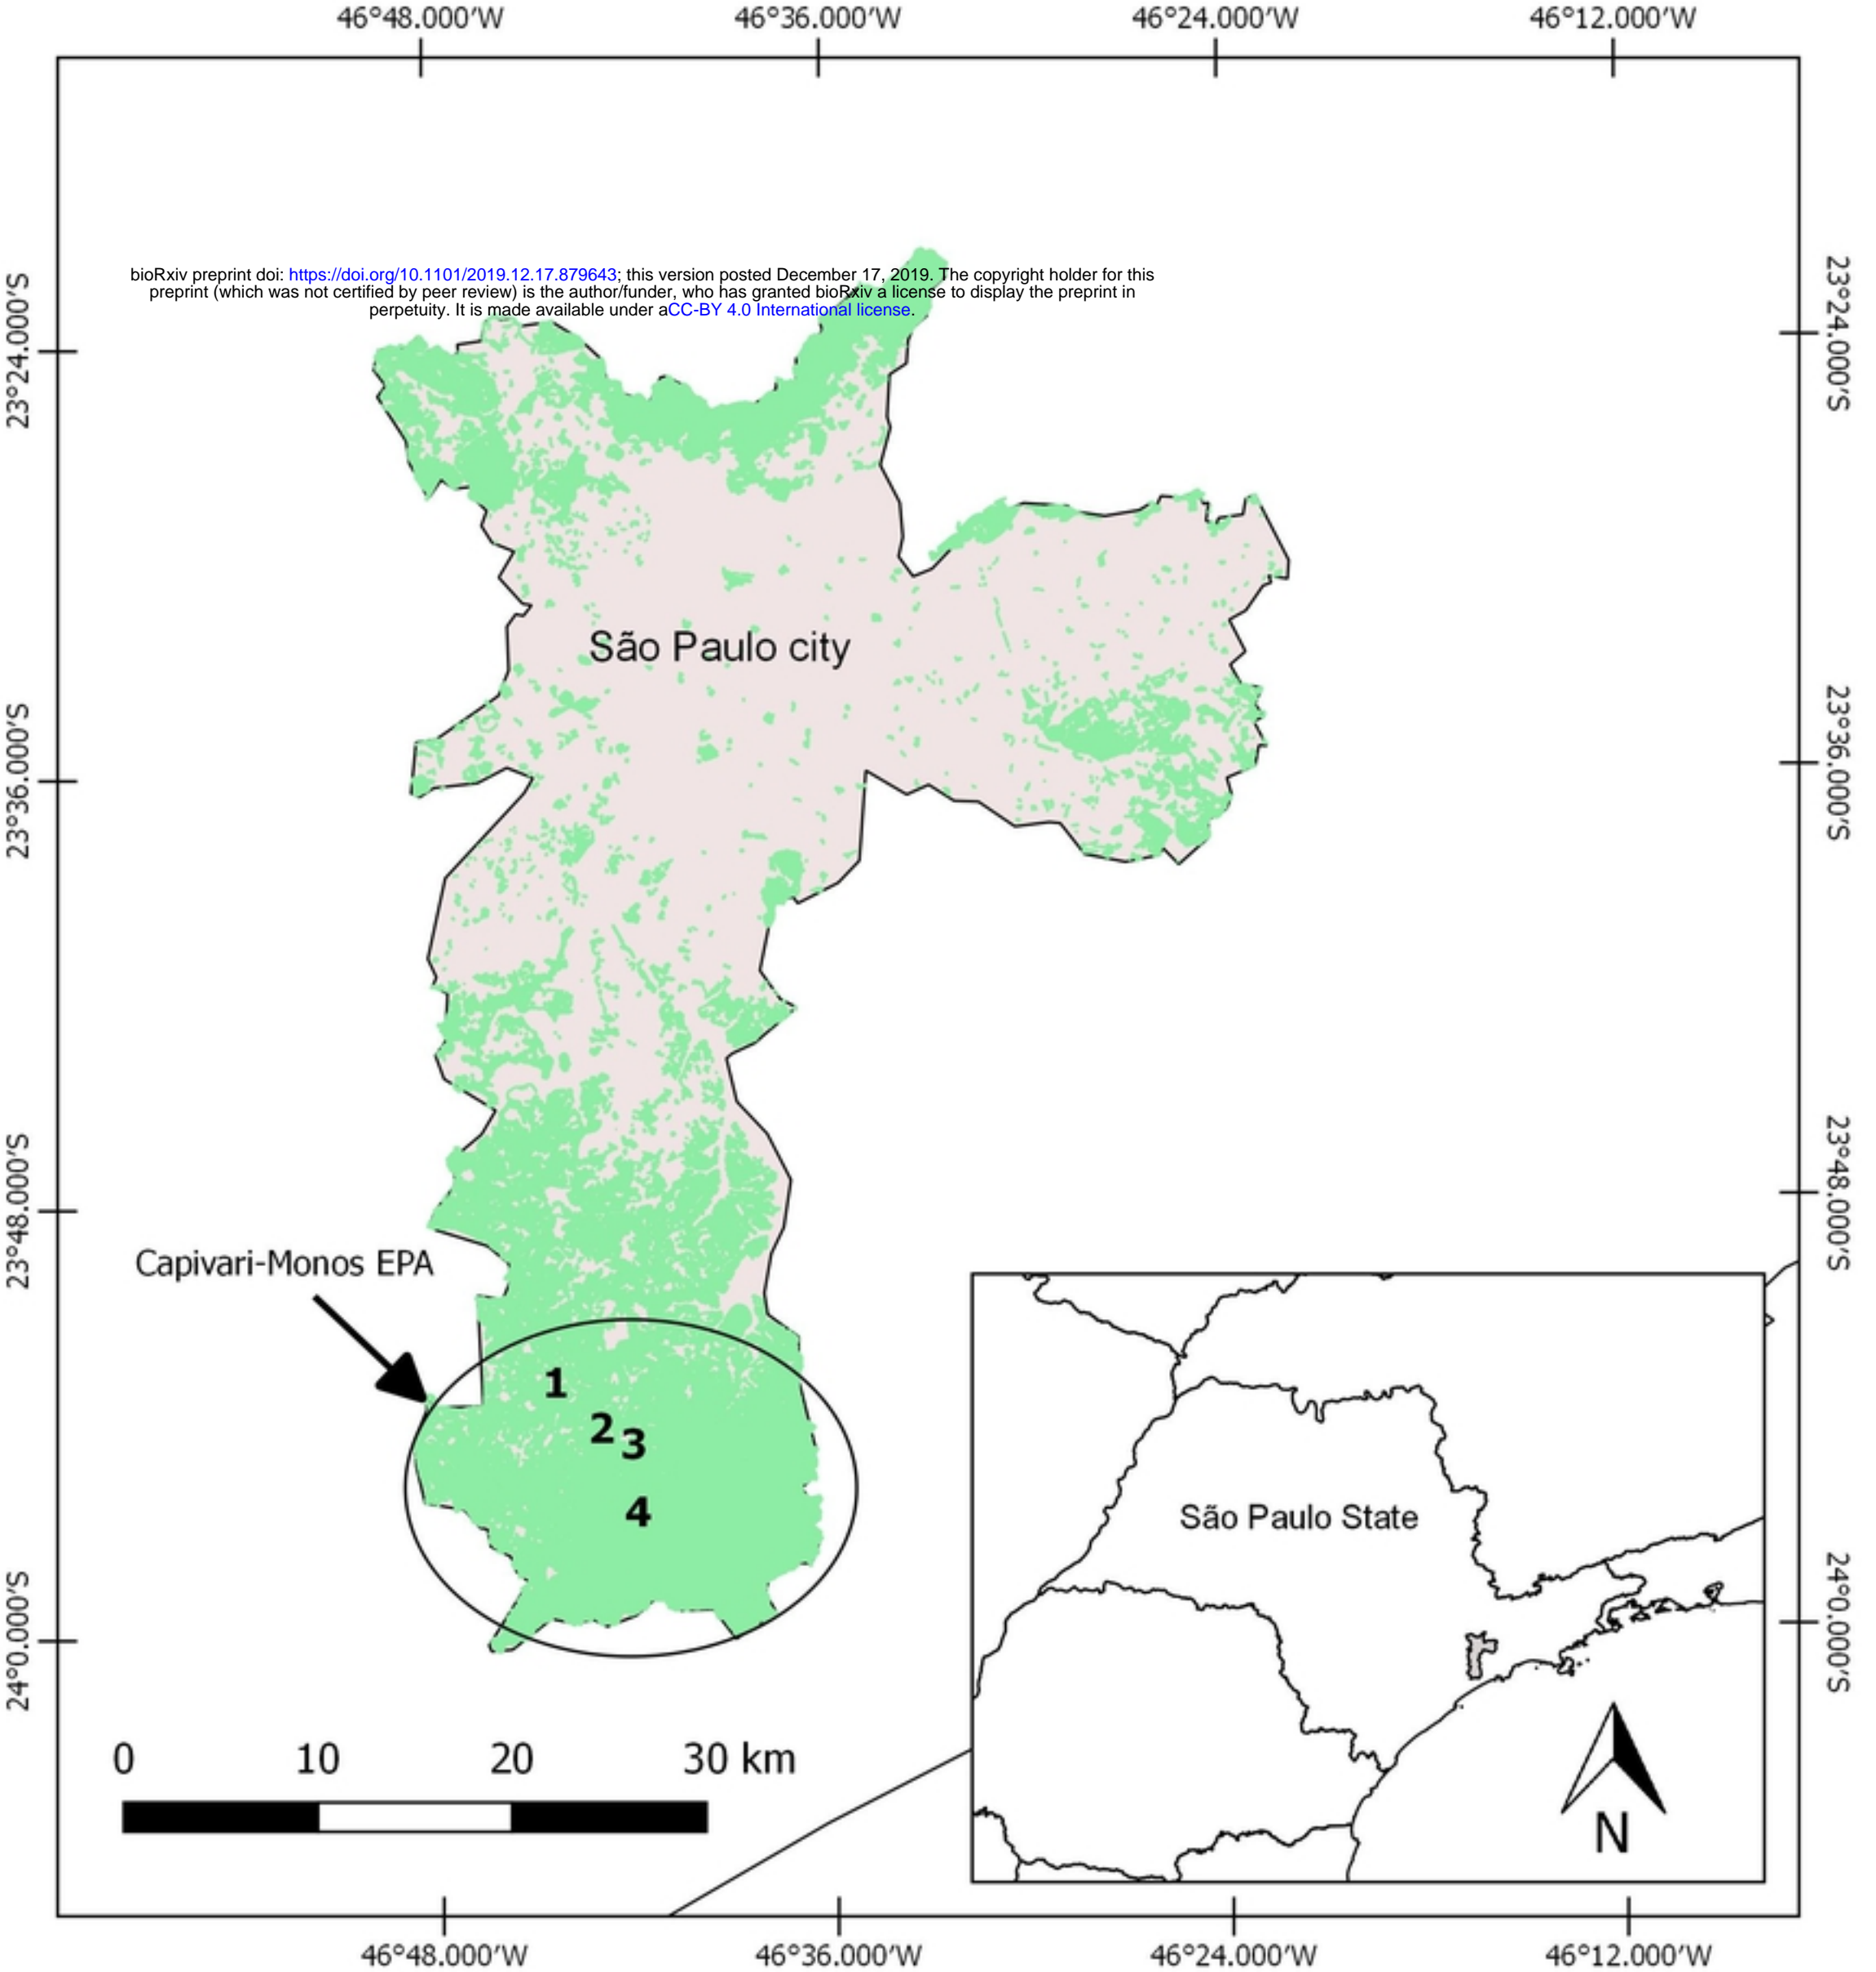

Figure 1

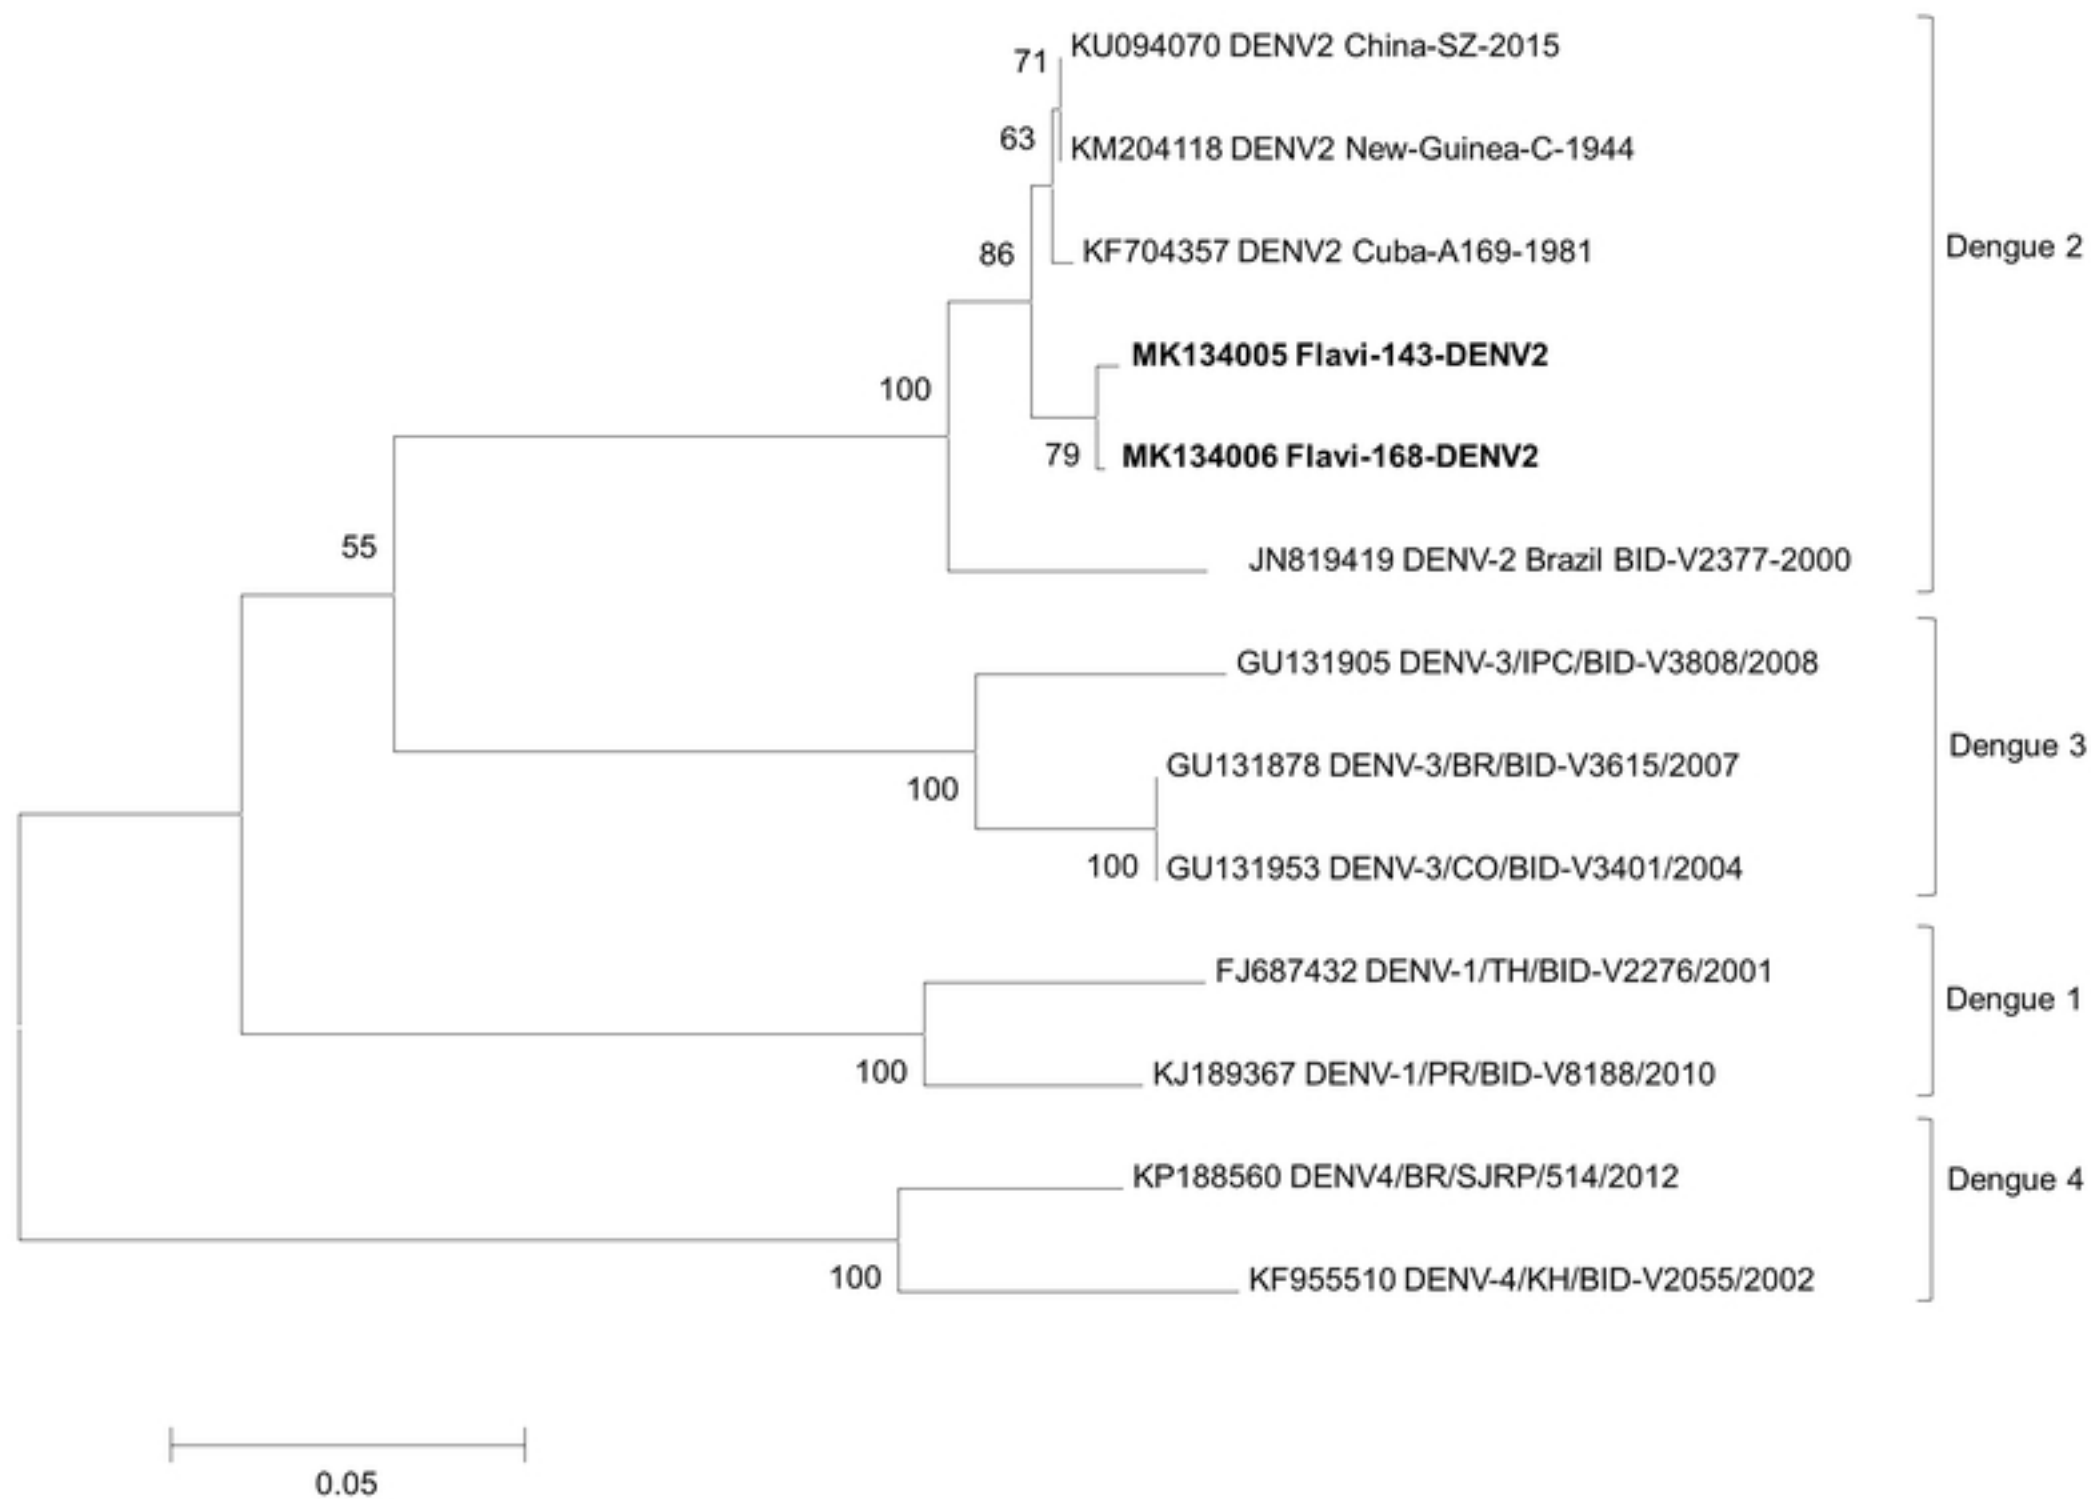

Figure 2

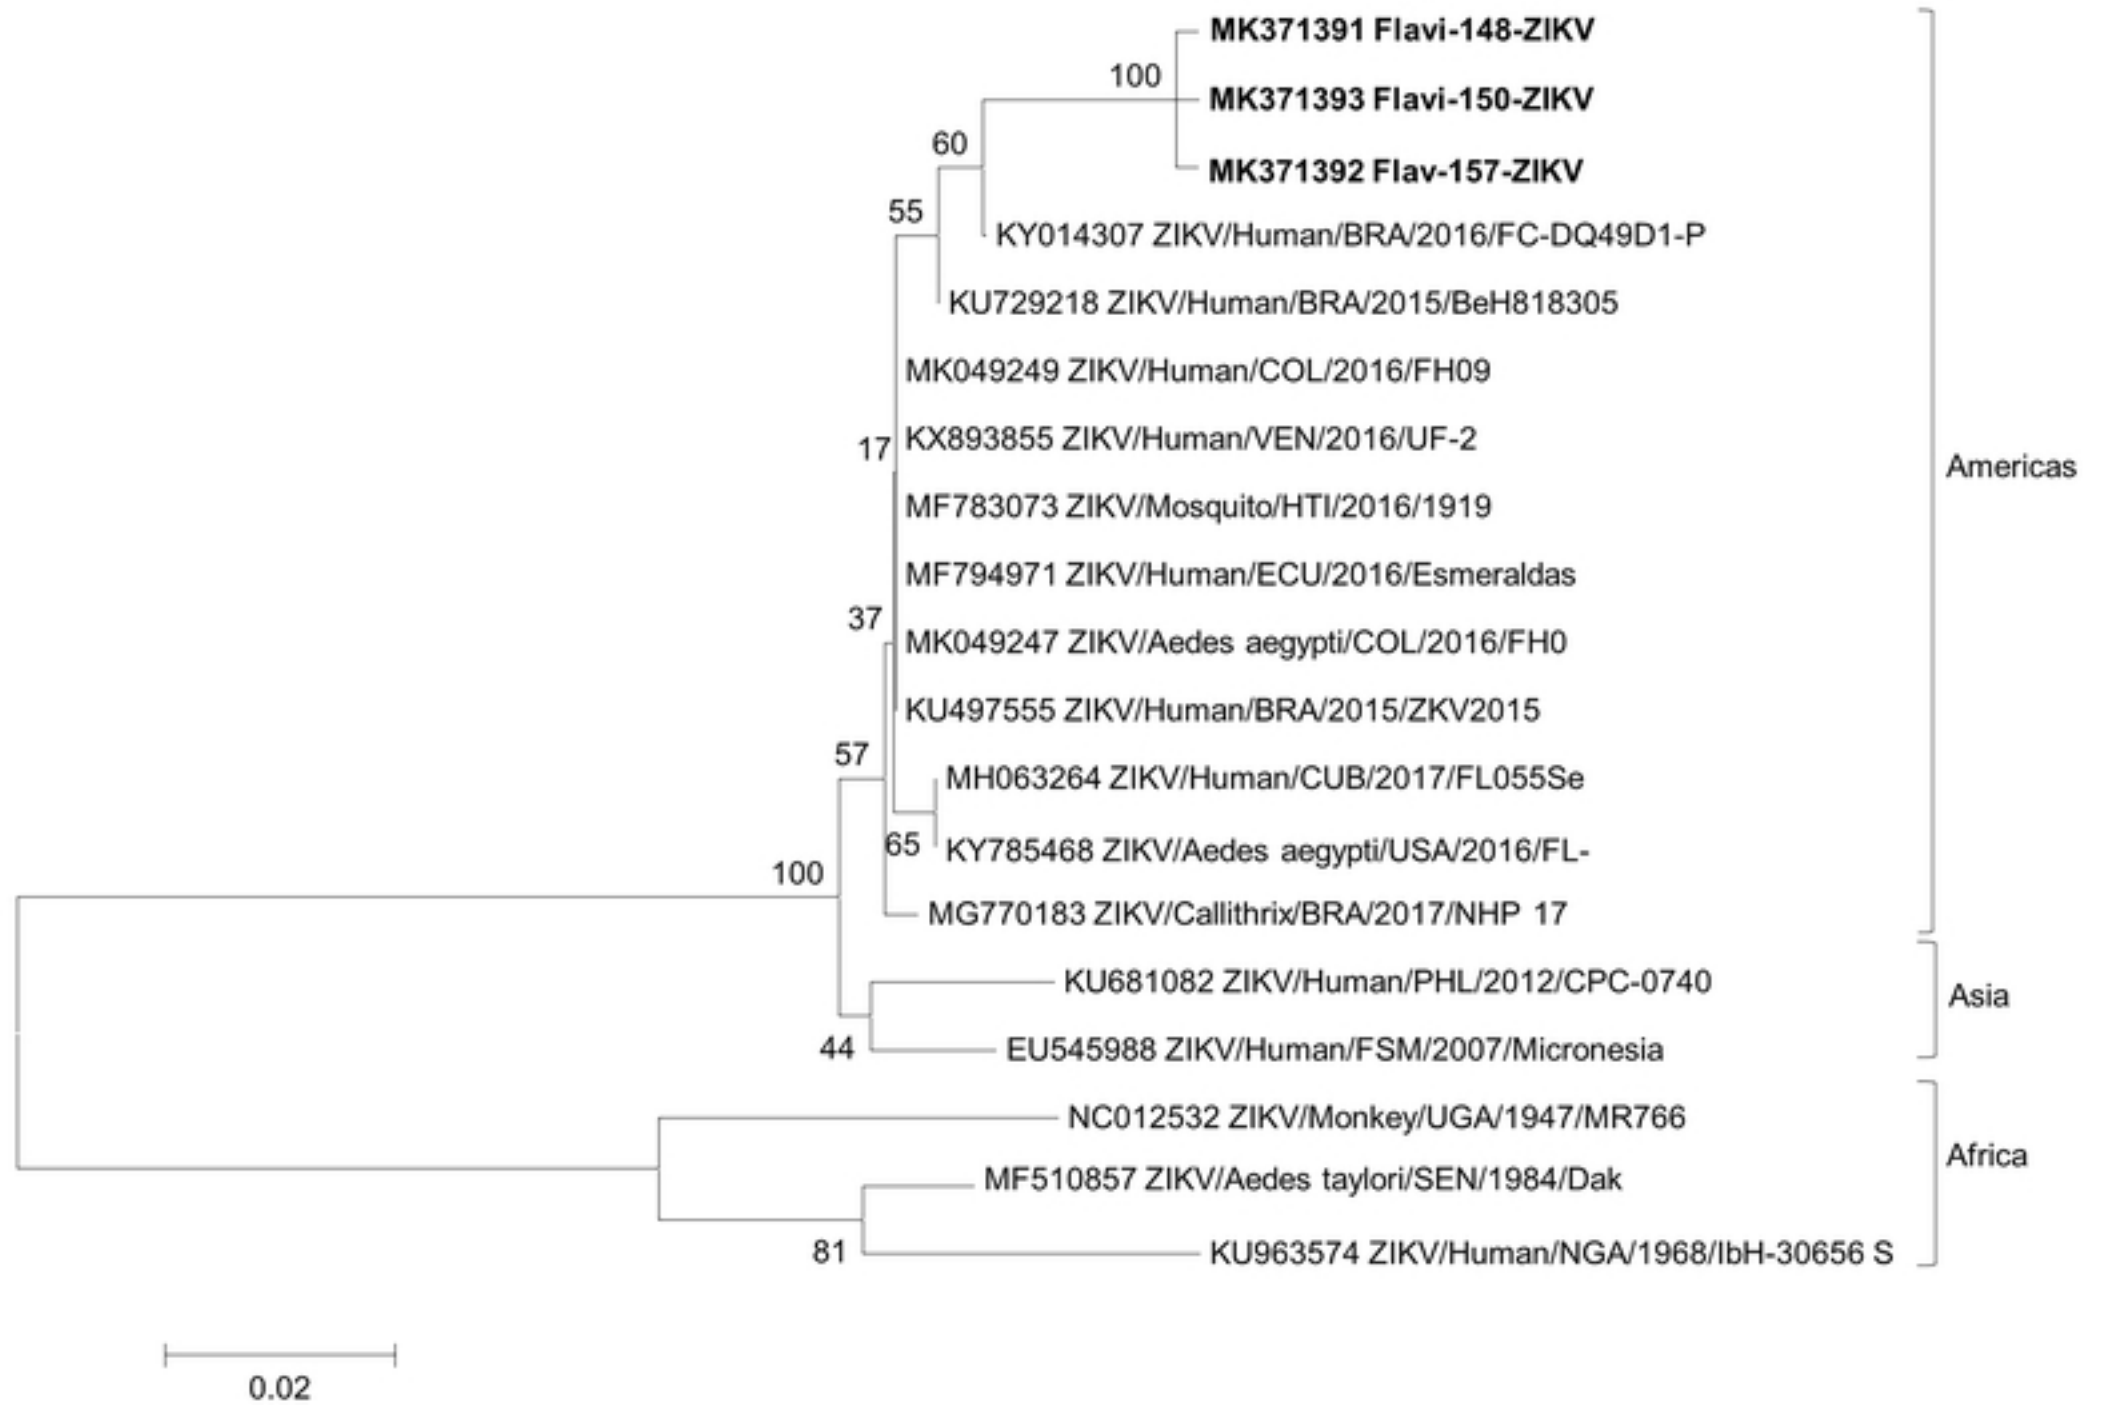

Figure 3
